# Supplementary material for: The Effect of Combined Tensile‐Torsional Loading Path on the Stress/Strain States of Thin‐Walled Circular Tubes
Source: Hindawi journal article supplement (doi:10.1155/2020/6692109), 2020-01-01
Supplement: f1 [file 6692109.f1.pdf]

## Supplementary Materials

With the development of oil drilling technology, land and deep-sea oil and gas resources have successively entered the exploration and development stage, which also puts forward higher requirements for the strength of drill pipes [33-34]. At present, the highest strength of the API series drill pipe is the S135 grade drill pipe, but as the drilling depth increases, it can no longer meet the drilling requirements of some ultra-deep wells. In addition to producing and supplying in accordance with API Spec 5D, domestic and foreign oil well drill pipe manufacturers have also developed high-performance non-API grade drill pipes to meet the special needs of users. Therefore, drilling tool manufacturers have successively developed V-150 high-strength drill pipes which have been widely used [35]. Compared with API S135 drill pipe, the strength of V-150 high-strength drill pipe can be increased by at least 103 MPa, which not only increases the drilling depth, but also increases the water hole size appropriately, which can increase drilling discharge, reduce circulating pressure consumption, and increase drilling efficiency by more than 50% . This is of great significance for ultra-deep well drilling and ocean exploration [36-37].

## References

33. Li, H.; Tian, W.; Kuang, X. OCTG supply-demand situation and countermeasures. *Steel Pipe*. **2010**, 39 (1): 1-7. DOI: 10.3969/j.issn.1001-2311.2010.01.001.
34. Jellison, M. J.; Chandler, R. B.; Payne, M.; Shepard, J. S. Ultradeep Drilling Pushes Drillstring Technology Innovations. *SPE Drilling & Completion*. **2008**, 23(02):190-200. DOI: 10.2118/104827-pa.
35. Gong, D.; Yu S.; Yuan P.; Shuai, Y. Fracture failure analysis of V150 high-strength drill pipe. *Heat Treatment of Metals*. **2015**, 40 (10): 205-210. DOI: 10.13251/j.issn.0254-6051.2015.10.046.
36. Li, Y.; Li, H.; Wang, X.; Liu, J.; Wu, Y.; Zhao, Y.; Xie, K. Effect of tempering process on strength and toughness of oil casing tube for ultra-deep well. *Journal of Central South University (Science and Technology)*. **2013**, 44 (6): 2244-2251. DOI: CNKI:SUN:ZNGD.0.2013-06-009.
37. Yu, R.; Yuan, P. Aluminum drill pipe characteristics and potential applications. *Oil Field Equipment*. **2011**, 40 (3): 81-85. DOI: CNKI:SUN:SKJX.0.2011-03-022.
